# Supplementary material
Source: ML conference proceedings conference paper supplement (https://proceedings.neurips.cc/paper_files/paper/2010/hash/aff1621254f7c1be92f64550478c56e6-Abstract.html)
Supplement: Supplementary file [file aff1621254f7c1be92f64550478c56e6-Supplemental.zip]

---

## Supplementary Material

### Multitask Learning without Label Correspondences

---

#### A Proof of lemma 2

**Proof** Denote by  $\mathcal{B}$  a Banach space and let  $\mathcal{B}^*$  be its dual. Denote space of conditional distributions  $\mathcal{P} = \{p_{y|x} \mid p(y|x) \geq 0, \sum_{y \in \mathcal{Y}} p(y|x) = 1, \forall x \in \mathcal{X}, y \in \mathcal{Y}\}$ . Let  $A$  be the conditional expectation operator of the feature map  $\phi(x, y)$  with respect to conditional distribution  $p(y|x)$ , that is  $Ap_{y|x} = \mathbf{E}_{y \sim p(y|x)}[\phi(x, y)]$ . Fenchel's Duality [21, Theorem 4.4.3] states

$$\inf_{p_{y|x} \in \mathcal{P}} \{f(p_{y|x}) + g(Ap_{y|x})\} = \sup_{\theta \in \mathcal{B}^*} \{-f^*(A^*\theta) - g^*(-\theta)\}. \quad (12)$$

First, note that the adjoint of the linear operator  $A$  is  $\langle Ap_{y|x}, \theta \rangle = \langle A^*\theta, p_{y|x} \rangle$ , then we have

$\langle \sum_{y \in \mathcal{Y}} p_{y|x} \phi(x, y), \theta \rangle = \sum_{y \in \mathcal{Y}} p_{y|x} \langle \phi(x, y), \theta \rangle$ , thus  $A^*\theta = \langle \phi(x, y), \theta \rangle$ . Define  $f(p_{y|x}) = p_{y|x} \log p_{y|x} + c \cdot p_{y|x} + \Lambda_{p_{y|x}}(\sum_{y \in \mathcal{Y}} p_{y|x} - 1)$  where  $c$  is the constant part w.r.t.  $p_{y|x}$  (i.e. the gradient of the joint entropy), we the have  $f^*(p_{y|x}^*) = \Lambda_{p_{y|x}^*} + \exp(p_{y|x}^* - 1 - c - \Lambda_{p_{y|x}^*})$  as its dual. Hence the dual of  $\sum_{x \in \mathcal{X}} [-H(p_{y|x}) + \lambda \sum_{y \in \mathcal{Y}} g_y(x)p_{y|x}]$  is

$$\sum_{i=1}^m \left[ \sum_y \exp(\langle \theta, \phi(x_i, y) \rangle - 1 - \lambda g_y(x_i) - \Lambda_{p_{y|x}^*}) + \Lambda_{p_{y|x}^*} \right] \quad (13)$$

Solving for optimality in  $\Lambda_{p_{y|x}^*}$  gives  $\sum_{i=1}^m \log \sum_y \exp(\langle \theta, \phi(x_i, y) \rangle - \lambda g_y(x_i))$ . Similarly for  $x' \in \mathcal{X}'$ . The dual of the approximate moment matching constraint follows directly from [5, Lemma 6]. ■
